# Supplementary material for: Guidelines for Developing and Reporting Machine Learning Predictive Models in Biomedical Research: A Multidisciplinary View
Source: PubMed Central journal article supplement (PMC5238707; doi:10.2196/jmir.5870), 2016-12-16
Supplement: jmir_v18i12e323_app2.pdf [file jmir_v18i12e323_app2.pdf]

| <b>Terms</b>                                   | <b>Description</b>                                                                                                          |
|------------------------------------------------|-----------------------------------------------------------------------------------------------------------------------------|
| <b>Internal validation</b>                     | Validation of model using data from the same source as training                                                             |
| <b>External validation</b>                     | Validation of model using data from a source different from training                                                        |
| <b>Response variable</b>                       | Variable to be predicted. Also known as dependent variable                                                                  |
| <b>Independent variable</b>                    | Variables used to predict the response variable. Also known as feature                                                      |
| <b>True positive (TP)</b>                      | Correct positive prediction                                                                                                 |
| <b>True negative (TN)</b>                      | Correct negative prediction                                                                                                 |
| <b>False positive (FP)</b>                     | Predicting positive, but actually negative                                                                                  |
| <b>False negative (FN)</b>                     | Predicting negative, but actually positive                                                                                  |
| <b>Sensitivity</b>                             | $TP/(TP+FN)$                                                                                                                |
| <b>Specificity</b>                             | $TN/(TN+FP)$                                                                                                                |
| <b>Positive predictive value (PPV)</b>         | $TP/(TP+FP)$                                                                                                                |
| <b>Negative predictive value (NPV)</b>         | $TN/(TN+FN)$                                                                                                                |
| <b>Receiver operating characteristic (ROC)</b> | A curve showing true positive rate (TPR) against the false positive rate (FPR) at various discrimination threshold settings |
| <b>Area under the ROC (AUC)</b>                | The area under the ROC curve. It is often used to compare predictive models.                                                |
